# Supplementary material
Source: publisher figshare collection journal article supplement (https://asha.figshare.com/articles/dataset/_/19593388)
Supplement: Supplementary file 2 [file 1]

## Supplemental Material S1. Questionnaire in Dutch.

### Werksetting

*De volgende zeven vragen peilen naar uw werksetting.*

1. Hoelang bent u reeds professioneel audicien in een hoorcentrum?  
..... jaren en ..... maanden
2. In welke provincie is het hoorcentrum waarin u bent tewerkgesteld gelegen. Indien u in meerdere hoorcentra in verschillende provincies bent tewerkgesteld, duidt u meerdere antwoorden aan.
  - a. West-Vlaanderen
  - b. Oost-Vlaanderen
  - c. Antwerpen
  - d. Vlaams-Brabant
  - e. Limburg
  - f. Brussel Hoofdstedelijk Gewest
3. Op welke manier voert u uw beroep uit?
  - a. Zelfstandig
  - b. In loondienst
4. Specificeer de verhouding tussen het aantal volwassenen ( $\geq 18$  jaar) en aantal kinderen ( $< 18$  jaar) dat u gemiddeld op jaarbasis behandelt. Geef dit weer in een percentage (bv. 80% volwassenen, 20% kinderen). Dit mag een ruwe schatting zijn. Specificeer dit voor u persoonlijk en niet voor het volledige hoorcentrum.  
..... % volwassenen en ..... % kinderen
5. Specificeer hoeveel nieuwe volwassen cliënten met leeftijdsgebonden gehoorverlies u gemiddeld op jaarbasis test (ongedacht of deze daarna met hoortoestellen werden aangepast). Met nieuwe cliënten worden geen bestaande cliënten, maar enkel eerste aanmeldingen bedoeld. Dit mag een ruwe schatting zijn. Specificeer dit voor u persoonlijk en niet voor het volledige hoorcentrum.
  - a. Minder dan 100
  - b. Tussen 100 en 150
  - c. Tussen 150 en 200
  - d. Tussen 200 en 250
  - e. Meer dan 250

6. Geef in procenten aan hoeveel van deze nieuwe volwassen cliënten met leeftijdsgehoorverlies een bepaalde gehoorernst vertoonden op basis van hun PTA (gemiddeld verlies op 1000, 2000 en 4000 Hz). Dit mag een ruwe schatting zijn. Specificeer dit voor u persoonlijk en niet voor het volledige hoorcentrum.
  - a. Mild gehoorverlies (21 – 40 dB): .....
  - b. Matig gehoorverlies (41 – 70 dB): .....
  - c. Ernstige gehoorverlies (71 – 90 dB): .....
  - d. Zeer ernstig gehoorverlies (> 90 dB): .....
  
7. Specificeer hoeveel van deze nieuwe volwassen cliënten met leeftijdsgebonden gehoorverlies u gemiddeld op jaarbasis met bilaterale hoortoestellen heeft aangepast, leidend tot de aankoop van hoortoestellen. Dit mag een ruwe schatting zijn. Specificeer dit voor u persoonlijk en niet voor het volledige hoorcentrum.
  - a. Minder dan 100
  - b. Tussen 100 en 150
  - c. Tussen 150 en 200
  - d. Tussen 200 en 250
  - e. Meer dan 250

## Praktijkervaring

*De volgende zestien vragen peilen naar uw praktijkervaring omtrent het aanpassen van hoortoestellen bij volwassen cliënten met leeftijdsgebonden gehoorverlies, al dan niet gelinkt aan cognitie (d.i. mentale processen in de hersenen bedoeld die optreden wanneer mensen waarnemen, informatie verwerken, leren, denken en problemen oplossen) en luisterinspanning (d.i. aandacht en cognitieve inspanning tijdens spraakverstaan). De onderstaande vragen dient u telkens eerlijk en naar waarheid te beantwoorden op basis van uw ervaring met volwassen cliënten met leeftijdsgebonden gehoorverlies.*

8. Ik heb begrepen dat alle onderstaande vragen dienen te worden ingevuld voor volwassen cliënten met leeftijdsgebonden gehoorverlies.
  - a. Ja
9. Ik bevraag luisterinspanning in dagdagelijkse situaties (d.i. aandacht en cognitieve inspanning tijdens spraakverstaan) letterlijk tijdens het anamnesegebesprek?
  - a. Nooit
  - b. Soms
  - c. Meestal
  - d. Altijd
10. Informatie omtrent luisterinspanning in dagdagelijkse situaties leid ik zelf af uit het anamnesegebesprek?
  - a. Nooit
  - b. Soms
  - c. Meestal
  - d. Altijd
11. Ik bevraag de cognitieve status van de cliënt letterlijk tijdens het anamnesegebesprek?
  - a. Nooit
  - b. Soms
  - c. Meestal
  - d. Altijd
12. Informatie omtrent de cognitieve status van de cliënt leid ik zelf af uit het anamnesegebesprek?
  - a. Nooit
  - b. Soms
  - c. Meestal
  - d. Altijd
13. Informatie omtrent de cognitieve status van de cliënt wordt aangegeven door een persoon uit de directe omgeving van de cliënt.
  - a. Nooit
  - b. Soms
  - c. Meestal
  - d. Altijd

14. Wordt de cognitieve status van de cliënt aan de hand van een (screenings)test in kaart gebracht?
- Ja
  - Nee
  - Indien ja, specificeer welke (screenings)test (bv. MoCA, MMSE, ...):
15. Ik heb het gevoel te herkennen wanneer de cliënt cognitief minder sterk is. 'Cognitief minder sterk' mag erg breed worden geïnterpreteerd, gaande van beginnende symptomen van cognitieve achteruitgang (bijvoorbeeld verstrooidheid, vergeetachtigheid, minder snel informatie verwerken, minder nauwkeuring informatie verwerken, ...) tot dementie. Het mag echter niet worden verward met een laag IQ, bv. mensen met een verstandelijke beperking horen niet tot de categorie 'cognitief minder sterk'.
- Nooit
  - Soms
  - Meestal
  - Altijd
16. Specificeer de verhouding tussen het aantal cliënten waarvan u weet en/of vermoedt dat ze cognitief minder sterk zijn en het aantal cliënten waarvan u vermoedt dat ze een cognitief normaal profiel hebben. Geef dit weer in een percentage (bv. 10% cognitief minder sterk, 90% normaal cognitief profiel). Dit mag een ruwe schatting zijn.
- 0 - 10% cognitief minder sterkere cliënten (m.a.w. 90 – 100 % cliënten met een normaal cognitief profiel)
  - 11 - 20% cognitief minder sterkere cliënten (m.a.w. 80 – 89 % cliënten met een normaal cognitief profiel)
  - 21 - 30% cognitief minder sterkere cliënten (m.a.w. 70 – 79 % cliënten met een normaal cognitief profiel)
  - 31 - 40% cognitief minder sterkere cliënten (m.a.w. 60 – 69 % cliënten met een normaal cognitief profiel)
  - 41 - 50% cognitief minder sterkere cliënten (m.a.w. 50 – 59 % cliënten met een normaal cognitief profiel)
17. Indien ik een hoortoestel aanpas bij een cliënt waarvan ik weet en/of vermoed dat deze cognitief minder sterk is, pas ik mijn strategie aan door (meerdere antwoorden mogelijk):
- De omgeving (familie, vrienden, ...) meer te betrekken
  - Meer tijd in te plannen voor een consult
  - Eenvoudigere instructies te geven
  - Trager te spreken
  - Meer visueel ondersteuningsmateriaal te gebruiken (bv. meer geschreven informatie mee te geven)
  - Meer objectieve testen te hanteren (bv. REM, data logging, ...)
  - Andere woordenlijsten bij spraakaudiometrie te hanteren
  - Ik pas mijn strategie niet aan
  - Andere: .....

18. Beantwoord volgende stellingen omtrent het instellen van een hoortoestel met ja, nee of ik weet het niet. Indien ja werd aangeduid, gelieve dit dan ook kort te specificeren door eventueel een concreet voorbeeld aan te halen.

| STELLINGEN                                                                                                                                                                                                                                                                                                                         | Ja | Nee | Ik weet het niet |
|------------------------------------------------------------------------------------------------------------------------------------------------------------------------------------------------------------------------------------------------------------------------------------------------------------------------------------|----|-----|------------------|
| Ik heb het gevoel ruisreductie anders in te stellen bij cliënten die cognitief minder sterk zijn in vergelijking met cognitief sterkere cliënten.<br>Bijvoorbeeld: eerder wel of niet inschakelen, sterkte van het ruisreductiesysteem aanpassen, ...                                                                              |    |     |                  |
| Ik heb het gevoel de microfoondirectionaliteit anders in te stellen bij cliënten die cognitief minder sterk zijn in vergelijking met cognitief sterkere cliënten. Bijvoorbeeld: eerder wel of niet inschakelen, automatisch schakelen tussen verschillende microfooninstellingen wel of niet inschakelen, ...                      |    |     |                  |
| Ik heb het gevoel amplitudecompressie anders in te stellen bij cliënten die cognitief minder sterk zijn in vergelijking met cognitief sterkere cliënten. Bijvoorbeeld: eerder wel of niet inschakelen, andere compressieratio hanteren, MPO aanpassen, in- en uitregeltijden aanpassen (snelheid waarop het systeem reageert), ... |    |     |                  |
| Ik heb het gevoel frequentiecompressie anders in te stellen bij cliënten die cognitief minder sterk zijn in vergelijking met cognitief sterkere cliënten. Bijvoorbeeld: eerder wel of niet inschakelen, andere compressieratio hanteren, ...                                                                                       |    |     |                  |
| Ik heb het gevoel de versterking anders in te stellen bij cliënten die cognitief minder sterk zijn in vergelijking met cognitief sterkere cliënten. Bijvoorbeeld: meer of minder versterking aanbieden, versterking minder snel of juist sneller opbouwen tijdens het fittingproces, ...                                           |    |     |                  |
| Ik heb het gevoel het aantal beschikbare manuele programma's in het hoortoestel anders in te stellen bij cliënten die cognitief minder sterk zijn in vergelijking met cognitief sterkere cliënten. Bijvoorbeeld: meer of minder beschikbare manuele programma's instellen, ...                                                     |    |     |                  |

19. Ik heb het gevoel dat cliënten die cognitief minder sterk zijn subjectief meer hoortoestelvoordeel hebben in vergelijking met cognitief sterkere cliënten. Met subjectief worden hun eigen ervaringen bedoeld.
  - a. Ja
  - b. Nee, subjectief minder hoortoestelvoordeel
  - c. Geen verschil
  - d. Ik weet het niet
20. Ik heb het gevoel dat cliënten die cognitief minder sterk zijn objectief meer hoortoestelvoordeel hebben in vergelijking met cognitief sterkere cliënten. Met objectief wordt de gehoorwinst op basis van standaard testen bedoeld.
  - a. Ja
  - b. Nee, objectief minder hoortoestelvoordeel
  - c. Geen verschil
  - d. Ik weet het niet
21. Ik heb het gevoel meer negatieve proeven te hebben bij cliënten die cognitief minder sterk zijn in vergelijking met cognitief sterkere cliënten.
  - a. Ja
  - b. Nee, minder negatieve proeven
  - c. Geen verschil
  - d. Ik weet het niet
22. Ik heb het gevoel dat cliënten die cognitief minder sterk zijn meer voordeel hebben bij een lagere technologieklasse in vergelijking met cognitief sterkere cliënten, ongeacht de sociale situatie van de cliënt.
  - a. Ja
  - b. Nee, meer voordeel bij een hogere technologieklasse
  - c. Geen verschil
  - d. Ik weet het niet
23. Ik heb het gevoel dat cliënten die cognitief minder sterk zijn meer gemotiveerd zijn in vergelijking met cognitief sterkere cliënten.
  - a. Ja
  - b. Nee, minder gemotiveerd
  - c. Geen verschil
  - d. Ik weet het niet

## Eigen kennis

*De volgende dertien vragen peilen naar uw kennis omtrent de link tussen spraakverstaan, cognitie (d.i. mentale processen in de hersenen bedoeld die optreden wanneer mensen waarnemen, informatie verwerken, leren, denken en problemen oplossen), luisterinspanning (aandacht en cognitieve inspanning tijdens spraakverstaan) en het hoortoestelvoordeel. Gelieve deze eerlijk en naar waarheid in te vullen.*

24. Hoe beoordeelt u uw kennis over cognitie? Met kennis wordt de theoretische basis en niet uw praktijkervaring bedoeld.
  - a. (VAS 0: geen tot beperkte kennis – 100: zeer goede kennis)
25. Hoe beoordeelt u uw kennis over de link tussen cognitie en spraakverstaan? Met kennis wordt de theoretische basis en niet uw praktijkervaring bedoeld.
  - a. (VAS 0: geen tot beperkte kennis – 100: zeer goede kennis)
26. Hoe beoordeelt u uw kennis over de link tussen cognitie en leeftijdsgebonden gehoorverlies? Met kennis wordt de theoretische basis en niet uw praktijkervaring bedoeld.
  - a. (VAS 0: geen tot beperkte kennis – 100: zeer goede kennis)
27. Hoe beoordeelt u uw kennis over de link tussen cognitie en het hoortoestelvoordeel? Met kennis wordt de theoretische basis en niet uw praktijkervaring bedoeld.
  - a. (VAS 0: geen tot beperkte kennis – 100: zeer goede kennis)
28. Hoe beoordeelt u uw kennis over luisterinspanning? Met kennis wordt de theoretische basis en niet uw praktijkervaring bedoeld.
  - a. (VAS 0: geen tot beperkte kennis – 100: zeer goede kennis)
29. Hoe beoordeelt u uw kennis over de link tussen cognitie en luisterinspanning? Met kennis wordt de theoretische basis en niet uw praktijkervaring bedoeld.
  - a. (VAS 0: geen tot beperkte kennis – 100: zeer goede kennis)
30. Hoe beoordeelt u uw kennis over de link tussen luisterinspanning en leeftijdsgebonden gehoorverlies? Met kennis wordt de theoretische basis en niet uw praktijkervaring bedoeld.
  - a. (VAS 0: geen tot beperkte kennis – 100: zeer goede kennis)
31. Hoe beoordeelt u uw kennis over de link tussen luisterinspanning en het hoortoestelvoordeel? Met kennis wordt de theoretische basis en niet uw praktijkervaring bedoeld.
  - a. (VAS 0: geen tot beperkte kennis – 100: zeer goede kennis)
32. Hoe beoordeelt u uw kennis omtrent testen die cognitie in kaart brengen? Met kennis wordt de theoretische basis en niet uw praktijkervaring bedoeld.
  - a. (VAS 0: geen tot beperkte kennis – 100: zeer goede kennis)

33. Hoe beoordeelt u uw kennis omtrent testen die luisterinspanning in kaart brengen? Met kennis wordt de theoretische basis en niet uw praktijkervaring bedoeld.
- (VAS 0: geen tot beperkte kennis – 100: zeer goede kennis)
34. Via welke weg hebt u reeds informatie ontvangen omtrent cognitie? (meerdere antwoorden mogelijk)
- Symposium
  - Webinar
  - Interne bijscholing
  - Wetenschappelijk artikel
  - Opleiding audiologie
  - Ik heb nog geen informatie omtrent cognitie ontvangen
  - Andere: .....
35. Via welke weg hebt u reeds informatie ontvangen omtrent luisterinspanning? (meerdere antwoorden mogelijk)
- Symposium
  - Webinar
  - Interne bijscholing
  - Wetenschappelijk artikel
  - Opleiding audiologie
  - Ik heb nog geen informatie omtrent luisterinspanning ontvangen
  - Andere: .....
36. Ik zou meer informatie willen omtrent de link tussen cognitie, luisterinspanning, gehoorverlies en het hoortoestelvoordeel via (meerdere antwoorden mogelijk)
- Informatiebrochure
  - Website
  - Wetenschappelijk artikel
  - Webinar
  - Symposium
  - Interne bijscholing
  - Andere: .....
  - Ik wens hier geen informatie over te ontvangen



## Bereidheid en richtlijnen

*De volgende tien vragen peilen naar uw bereidheid om cognitie in de audiologische praktijk te implementeren. Daarnaast wordt in sommige vragen gevraagd hoe deze implementatie voor u haalbaar zou zijn.*

37. Indien blijkt dat cognitie een belangrijke link heeft met het hoortoestelvoordeel ben ik als audicien bereid om cognitie standaard bij elke cliënt in kaart te brengen.
  - a. VAS (0: niet bereid – wel bereid)
38. Indien blijkt dat cognitie een belangrijke link heeft met het hoortoestelvoordeel ben ik als audicien bereid om cognitie enkel bij welbepaalde cliënten in kaart te brengen (bv. cliënten waarvan ik vermoed en/of weet dat ze cognitief minder sterk zijn).
  - a. VAS (0: niet bereid – wel bereid)
39. Indien blijkt dat cognitie een belangrijke link heeft met het hoortoestelvoordeel lijkt een samenwerking met andere disciplines (bv. neuropsychologie) noodzakelijk.
  - a. VAS (0: niet waar – helemaal waar)
40. Indien blijkt dat cognitie een belangrijke link heeft met het hoortoestelvoordeel lijkt een (interne) opleiding hieromtrent noodzakelijk alvorens audiciens dit in de praktijk kunnen toepassen.
  - a. VAS (0: niet waar – helemaal waar)
41. Ik zou me als audicien comfortabel voelen om de cognitieve resultaten met de cliënt te bespreken.
  - a. VAS (0: niet comfortabel – 100: heel comfortabel)
42. Ik vermoed dat cliënten geen bezwaar zullen hebben dat cognitieve testen standaard in de audiologische praktijk zullen worden afgenomen, wanneer het nut hiervan goed wordt gekaderd.
  - a. VAS (0: geen bezwaar – 100: wel bezwaar)
43. Ik vermoed dat de directe omgeving van de cliënt geen bezwaar zal hebben tegen het afnemen van cognitieve testen in de audiologische praktijk, wanneer het nut hiervan goed wordt gekaderd.
  - a. VAS (0: geen bezwaar – 100: wel bezwaar)
44. Ik zou me als audicien comfortabel voelen om cognitie af te nemen aan de hand van (meerdere antwoorden mogelijk)
  - a. Een anamnese gesprek
  - b. Een vragenlijst
  - c. Een screeningstest
  - d. Eén specifieke cognitieve test
  - e. Twee specifieke cognitieve testen
  - f. Meer dan twee specifieke cognitieve testen
  - g. Andere: .....

45. Ik zou me als audicien niet comfortabel voelen om cognitie af te nemen omdat (meerdere antwoorden mogelijk)
- a. Dit niet binnen mijn vakgebied ligt
  - b. Dit tijdsgewijs niet mogelijk lijkt
  - c. Ik schrik heb een onaangename reactie van cliënten te krijgen
  - d. Dit een extra terughoudende factor kan zijn voor cliënten om de stap naar hoortoestellen te zetten
  - e. Andere: .....
46. Het in kaart brengen van cognitie in de audiologische praktijk mag een maximale duurtijd hebben van .....
- ..... minuten

## **Demografische gegevens**

*Het einde van de vragenlijst is in zicht. De laatste drie vragen peilen naar een aantal demografische gegevens.*

47. Geboortedatum

48. Geslacht

- a. Man
- b. Vrouw
- c. X

49. Aan welke opleidingsinstelling volgde je de opleiding audiologie? In kader van een schakelprogramma van hogeschool naar universiteit dien je deze twee opleidingsinstellingen aan te duiden.

- a. Arteveldehogeschool
- b. Hogeschool Gent
- c. Katholiek Hogeschool VIVES
- d. Thomas More
- e. Katholieke Universiteit Leuven
- f. Universiteit Gent
- g. Andere: .....
